# Supplementary material for: Developing a web-based add-on intervention for parents of adolescents with Anorexia Nervosa: a mixed methods preliminary study
Source: Research Square preprint supplement (doi:10.21203/rs.3.rs-7253269/v1), 2025-08-22
Supplement: Supplementary file 1 [file caf7d35c12fac015f3f472bb.docx]

**Supplementary Material**

**Supplementary material 1**. French translated version of the Parents Versus Anorexia (PvA).

Veuillez évaluer les affirmations suivantes sur une échelle de 5 points ci-dessous. Notez-les en fonction de ce que vous pensez/ressentez en ce moment.

| 1) Je n'ai pas les connaissances nécessaires pour prendre un rôle de leader quand il s'agit de remporter une victoire totale sur l'anorexie | - Pas du tout d'accord - Pas d'accord - Ni d'accord, ni en désaccord - D'accord - Tout à fait d'accord |
| --- | --- |
| 2) Les parents ne peuvent pas être vus comme une solution pour le traitement de l'anorexie, si leur rôle comme cause de la maladie n'a pas été pleinement exploré | - Pas du tout d'accord - Pas d'accord - Ni d'accord, ni en désaccord - D'accord - Tout à fait d'accord |
| 3) Je me sens équipé de stratégies pratiques spécifiques pour mener à bien la guérison complète de mon enfant à la maison | - Pas du tout d'accord - Pas d'accord - Ni d'accord, ni en désaccord - D'accord - Tout à fait d'accord |
| 4) Il n'est pas toujours recommandé d'être dur avec un enfant souffrant d'anorexie, car il subira trop de traumatismes et de détresse | - Pas du tout d'accord - Pas d'accord - Ni d'accord, ni en désaccord - D'accord - Tout à fait d'accord |
| 5) Mon instinct de parent est un guide plus fiable pour la guérison de mon enfant souffrant d'une anorexie que les conseils d'experts que je pourrais recevoir de professionnels | - Pas du tout d'accord - Pas d'accord - Ni d'accord, ni en désaccord - D'accord - Tout à fait d'accord |
| 6) Bien que les parents soient importants, les enfants souffrant d'anorexie n'iront jamais mieux tant qu'ils ne recevront pas eux-mêmes une thérapie individuelle | - Pas du tout d'accord - Pas d'accord - Ni d'accord, ni en désaccord - D'accord - Tout à fait d'accord |
| 7) Il est plus de ma responsabilité que de celle de mon enfant de l'amener à un poids sain | - Pas du tout d'accord - Pas d'accord - Ni d'accord, ni en désaccord - D'accord - Tout à fait d'accord |
